# Supplementary material for: Association of Adiponectin, Leptin and Resistin Plasma Concentrations with Echocardiographic Parameters in Patients with Coronary Artery Disease
Source: MDPI journal article supplement (doi:10.3390/diagnostics11101774), 2021-09-26
Supplement: s1 [file s1]

**Table S1.** Comparisons of adipokine concentrations of CAD patients without and with HF.

| Adipokine           | Patients without HF<br>(n=97) | Patients with HF<br>(n=70) | p-Value         |
|---------------------|-------------------------------|----------------------------|-----------------|
| Adiponectin [µg/mL] | 4.65 ± 2.64                   | 6.08 ± 3.74                | <b>0.004731</b> |
| Leptin [ng/mL]      | 15.41 ± 19.93                 | 15.07 ± 14.85              | 0.586948        |
| Resistin [ng/mL]    | 7.80 ± 3.19                   | 7.83 ± 3.42                | 0.811578        |

Data are presented as mean ± SD

Significant differences (p&lt;0.05) are marked in bold.

**Table S2.** Correlations between plasma adipokine concentrations and echocardiographic parameters in CAD patients without or with HF.

| Parameter | Adiponectin                                |              |                                         |                | Leptin                                     |                |                                         |              | Resistin                                   |              |                                         |                 |
|-----------|--------------------------------------------|--------------|-----------------------------------------|----------------|--------------------------------------------|----------------|-----------------------------------------|--------------|--------------------------------------------|--------------|-----------------------------------------|-----------------|
|           | Correlations<br>for Patients<br>without HF |              | Correlations<br>for Patients<br>with HF |                | Correlations<br>for Patients<br>without HF |                | Correlations<br>for Patients<br>with HF |              | Correlations<br>for Patients<br>without HF |              | Correlations<br>for Patients<br>with HF |                 |
|           | (n=97)                                     |              | (n=70)                                  |                | (n=97)                                     |                | (n=70)                                  |              | (n=97)                                     |              | (n=70)                                  |                 |
|           | Rs                                         | p-value      | Rs                                      | p-value        | Rs                                         | p-value        | Rs                                      | p-value      | Rs                                         | p-value      | Rs                                      | p-value         |
| LVMi      | -0.08                                      | 0.454        | 0.04                                    | 0.735          | 0.05                                       | 0.605          | -0.19                                   | 0.118        | 0.06                                       | 0.549        | <b>0.31</b>                             | <b>0.010</b>    |
| LVEDV     | -0.18                                      | 0.083        | 0.13                                    | 0.298          | <b>-0.23</b>                               | <b>0.025</b>   | -0.03                                   | 0.780        | -0.13                                      | 0.216        | <b>0.41</b>                             | <b>0.000489</b> |
| LVEDVBSA  | -0.03                                      | 0.791        | 0.20                                    | 0.094          | <b>-0.30</b>                               | <b>0.00277</b> | -0.13                                   | 0.297        | -0.09                                      | 0.387        | <b>0.46</b>                             | <b>0.000092</b> |
| LVEDD     | -0.08                                      | 0.465        | 0.11                                    | 0.383          | <b>-0.20</b>                               | <b>0.047</b>   | -0.02                                   | 0.855        | -0.16                                      | 0.122        | <b>0.24</b>                             | <b>0.049</b>    |
| LVEDDBSA  | <b>0.20</b>                                | <b>0.049</b> | 0.22                                    | 0.0717         | <b>-0.26</b>                               | <b>0.00879</b> | -0.20                                   | 0.094        | -0.06                                      | 0.549        | 0.20                                    | 0.094           |
| LVEDSd    | -0.05                                      | 0.632        | 0.10                                    | 0.400          | -0.16                                      | 0.120          | -0.01                                   | 0.933        | -0.03                                      | 0.782        | 0.24                                    | 0.047           |
| IVSd      | -0.03                                      | 0.784        | -0.12                                   | 0.305          | <b>0.25</b>                                | <b>0.014</b>   | -0.12                                   | 0.340        | 0.17                                       | 0.095        | 0.14                                    | 0.255           |
| PWd       | -0.13                                      | 0.199        | 0.07                                    | 0.593          | 0.11                                       | 0.285          | 0.01                                    | 0.938        | 0.07                                       | 0.509        | -0.06                                   | 0.613           |
| Ao        | <b>-0.25</b>                               | <b>0.013</b> | 0.005                                   | 0.970          | <b>-0.23</b>                               | <b>0.022</b>   | -0.07                                   | 0.567        | <b>-0.21</b>                               | <b>0.040</b> | 0.15                                    | 0.230           |
| LAD       | -0.02                                      | 0.850        | 0.19                                    | 0.110          | 0.07                                       | 0.483          | 0.06                                    | 0.650        | -0.02                                      | 0.820        | 0.08                                    | 0.517           |
| RVEDD     | -0.10                                      | 0.327        | 0.16                                    | 0.191          | 0.08                                       | 0.409          | 0.09                                    | 0.475        | -0.01                                      | 0.959        | 0.14                                    | 0.251           |
| RVSP      | 0.05                                       | 0.809        | 0.21                                    | 0.226          | 0.28                                       | 0.181          | -0.07                                   | 0.700        | 0.04                                       | 0.851        | 0.10                                    | 0.591           |
| LVEF      | -0.08                                      | 0.447        | -0.12                                   | 0.313          | 0.11                                       | 0.297          | 0.04                                    | 0.730        | 0.06                                       | 0.579        | <b>-0.36</b>                            | <b>0.002116</b> |
| LVSF      | 0.04                                       | 0.698        | -0.15                                   | 0.212          | 0.06                                       | 0.552          | 0.03                                    | 0.831        | -0.06                                      | 0.574        | <b>-0.25</b>                            | <b>0.039</b>    |
| E/A       | -0.11                                      | 0.301        | <b>0.32</b>                             | <b>0.013</b>   | -0.17                                      | 0.092          | 0.07                                    | 0.573        | <b>-0.23</b>                               | <b>0.022</b> | -0.13                                   | 0.332           |
| DT        | -0.08                                      | 0.416        | -0.19                                   | 0.140          | 0.13                                       | 0.193          | -0.22                                   | 0.082        | -0.01                                      | 0.931        | -0.06                                   | 0.643           |
| IVRT      | -0.06                                      | 0.573        | <b>-0.28</b>                            | <b>0.026</b>   | -0.16                                      | 0.129          | <b>-0.28</b>                            | <b>0.023</b> | -0.06                                      | 0.588        | 0.06                                    | 0.629           |
| TEI       | -0.13                                      | 0.214        | 0.02                                    | 0.910          | -0.18                                      | 0.083          | <b>-0.28</b>                            | <b>0.032</b> | -0.03                                      | 0.799        | <b>0.38</b>                             | <b>0.003</b>    |
| Vp        | -0.10                                      | 0.320        | 0.13                                    | 0.321          | 0.13                                       | 0.224          | 0.22                                    | 0.085        | -0.03                                      | 0.799        | -0.15                                   | 0.253           |
| MR        | 0.16                                       | 0.126        | <b>0.43</b>                             | <b>0.00021</b> | -0.03                                      | 0.748          | 0.02                                    | 0.875        | -0.20                                      | 0.057        | 0.23                                    | 0.057           |

Significant correlations (p&lt;0.05) are marked in bold.

Abbreviations: Ao – ascending aorta diameter; DT – mitral valve deceleration time; E/A – mitral valve E/A ratio; IVRT – isovolumetric relaxation time; IVSd – intraventricular septal end-diastolic thickness; LAD – left atrium diameter; LVEDD – left ventricular end-diastolic diameter; LVEDDBSA – left ventricular end-diastolic diameter/body surface area; LVEDV – left ventricular end-diastolic volume; LVEDVBSA – left ventricular end-diastolic volume/body surface area; LVEF – left ventricular ejection fraction; LVESD – left ventricular end-systolic diameter; LVMi – left ventricular mass index; LVSF – left ventricular shortening fraction; MR – grade of mitral regurgitation, PWd – posterior wall end-diastolic thickness; RVEDD – right ventricular end-diastolic diameter; RVSP – right ventricular systolic pressure; TEI – Tei index; Vp – propagation velocity.
